# Factors Affecting Medication Adherence Among patient with Schizophrenia: A Literature Review

<sup>1,2</sup>Faizatur Rohmi, <sup>3</sup>Moses Glorino Rumambo Pandin

<sup>1</sup>Student Of Doctoral Program in Nursing, Faculty of Nursing, Airlangga University

<sup>2</sup>Kepanjen School of Health Sciences

<sup>3</sup>Departement of English Literature, Faculty of Cultural Sciences, Airlangga University

Corresponding author: Faizatur Rohmi

Emai: [faizatur.rohmi-2021@fkip.unair.ac.id](mailto:faizatur.rohmi-2021@fkip.unair.ac.id)

Campus C Mulyorejo Surabaya 60115 Tel. (031) 5913574, Fax. (031) 5913257  
Airlangga University

## Abstract

This review aimed to summarize empirical evidence concerning to the factors relating to medication adherence among patients with schizophrenia. A comprehensive search was implemented to recruit articles which met the present eligibility criteria. Twenty articles were included, all of which were quantitative studies. Greater awareness of illness (insight), previous history of medication adherence, positive attitude toward medication, types of atypical antipsychotics, less severe psychotic symptoms, and social support, self-efficacy, general health status, gender men, lower socioeconomic status, living alone, length of illness, drug abuse, education level, severity of illness for example being in the acute phase, participating in mental health services, health facilities, marital status, receiving monotherapy were identified as factors of medication adherence. Implications to clinical practice include providing psychoeducation to patients and family by increasing their knowledge about illness and medication.

**Keyword :** *Schizophrenia, Medication, Adherence*

## INTRODUCTION

Schizophrenia is a psychotic disorder which consists of a range of features and affects 20 million people worldwide which is characterized by distortions in thinking, perception, emotion, language, and behavior as well as an inability to make interpersonal relationships with other people in time, place and environment (American Psychiatric Association, 2013; Townsend & Morgan, 2018; Videbeck, 2020; WHO, 2019).

Based on the results of the 2018 Riskesdas in Indonesia, it was stated that the prevalence of schizophrenia in the 2013-2018 period was 7 per mile (Kemenkes RI, 2018). Based on years of

NOTE: This preprint reports new research that has not been certified by peer review and should not be used to guide clinical practice.

life with disability (YLDS) mental disorders have a contributor of 13.5%, with indicator coverage of people with mental disorders receiving treatment and not being neglected reaching 37.47% in East Java (Kemenkes RI, 2019).

Schizophrenia requires long-term treatment which usually comprises antipsychotics and psychosocial interventions (Townsend, 2011; Videbeck, 2020). Antipsychotics comprise two classes: typical and atypical (Meltzer, 2013). Despite the available treatments, schizophrenia is also marked by frequent relapses and remission (American Psychiatric Association, 2013). The lack of insight about one's mental condition is common among individuals with schizophrenia and may also impede adherence to medication (American Psychiatric Association, 2013). Adherence is a complex phenomenon and is very difficult to detect when people with psychotic disorders are not undergoing hospitalization (Leijala et al., 2021). Various studies stated that this non-adherence is one of the reasons a person can relapse, return to the hospital and this will have an impact on a higher treatment costs (Abdisa et al., 2020); (Chai et al., 2021) Various precipitating factors cause non-adherence to treatment, but the main factor is not yet known with certainty. Based on several research results, 19.1% did not adhere to treatment (Şahin Altun et al., 2021).

The problem of adherence to medication is not a problem unique to schizophrenia. People with conditions such as obstructive pulmonary disease, diabetes, sexually transmitted diseases, cardiovascular disease, chronic pain, and other mental disorders also have problems adhering to medication (Ingersoll & Cohen, 2008). Adherence is defined as “the extent to which a person's behavior in taking medication, following a diet, and/or making lifestyle changes, is in accordance with agreed recommendations from health care providers” (WHO, 2019). Therefore, medication adherence in this review was determined as a behavior that must be followed by prescription drugs (antipsychotics) according to doctor's orders.

Adherence can have an immediate impact. Drug nonadherence to psychotic medication can worsen psychiatric symptoms (Perkins, 1999) and social functioning (Perkins, 1999) and can lead to suicide (Perkins, 1999). Return costs for nonadherence to hospital admissions among patients with schizophrenia ranged from US\$1392 million to \$1826 million in the United States in 2005 (Perkins, 1999) Therefore, the impact not only affects individuals, but also society.

It is important to understand factors associated with medication adherence among people with schizophrenia. As such, this literature review was conducted to summarize empirical evidence concerning factors relating to medication review

## METHODS

Comprehensive literature search for published studies was first conducted by using the following electronic databases: SCOPUS, SCIENCE DIRECT, SAGE, PsychINFO, and PubMed. Next, reference lists of retrieved articles were also scanned through to retrieve additional articles. The inclusion criteria were studies that (a) were written in English in the last 5 years (2019–2021), (b) utilized quantitative research designs, (c) recruited adult participants with schizophrenia aged between 18 to 65 years, and (d) examined factors relating to medication adherence. The keywords used in the search included “medication”, “adherence”, “non-adherence”, “adherencee”, “non-adherencee”, “antipsychotic”, “neuroleptic”, “schizophrenia”, “psychosis”, “predictor”, “reason”, “factor”, “variable”, “determinant”, “element”, “component”, “aspect”, “belief”, “attitude”, “influence”, and “effect”. This review excluded studies that conducted on participants who had criminal records, as they might not represent the general schizophrenia population. All included studies were also assessed for methodological quality by using the Joanna Briggs Institute (JBI) Critical Appraisal Instrument (JBI, 2014).

Articles obtained in the search process are then selected based on inclusion and exclusion criteria that shown in table 1:

**Tabel 1 *Inclusion and exclusion criteria with PICOS***

| Criteria          | Inclusion                                                   | Exclusion                                                                                                                                        |
|-------------------|-------------------------------------------------------------|--------------------------------------------------------------------------------------------------------------------------------------------------|
| Population        | schizophrenia                                               | Not shizophrenia                                                                                                                                 |
| Intervention      | There are no intervention                                   | There are no criteria exclusion                                                                                                                  |
| Comparisons       | There are no comparison                                     | There are no comparison                                                                                                                          |
| Outcome           | Factors of therapy adherence in patients with schizophrenia | There are no criteria exclusion                                                                                                                  |
| Study Type        | Cross sectional, longitudinal                               | Not relevant to therapy adherence factors in people with schizophrenia                                                                           |
| Publication Type  | Peer reviewed original studies                              | mixed method, a quasi experimental design, clinical trial or randomized controlled trial, Systematic or literature reviews, qualitative research |
| Publication Years | 2019 – 2021                                                 | Peer reviewed original studies Non peer-reviewed studies                                                                                         |
| Language          | English                                                     | Pre 2019                                                                                                                                         |
|                   |                                                             | Non English Language                                                                                                                             |

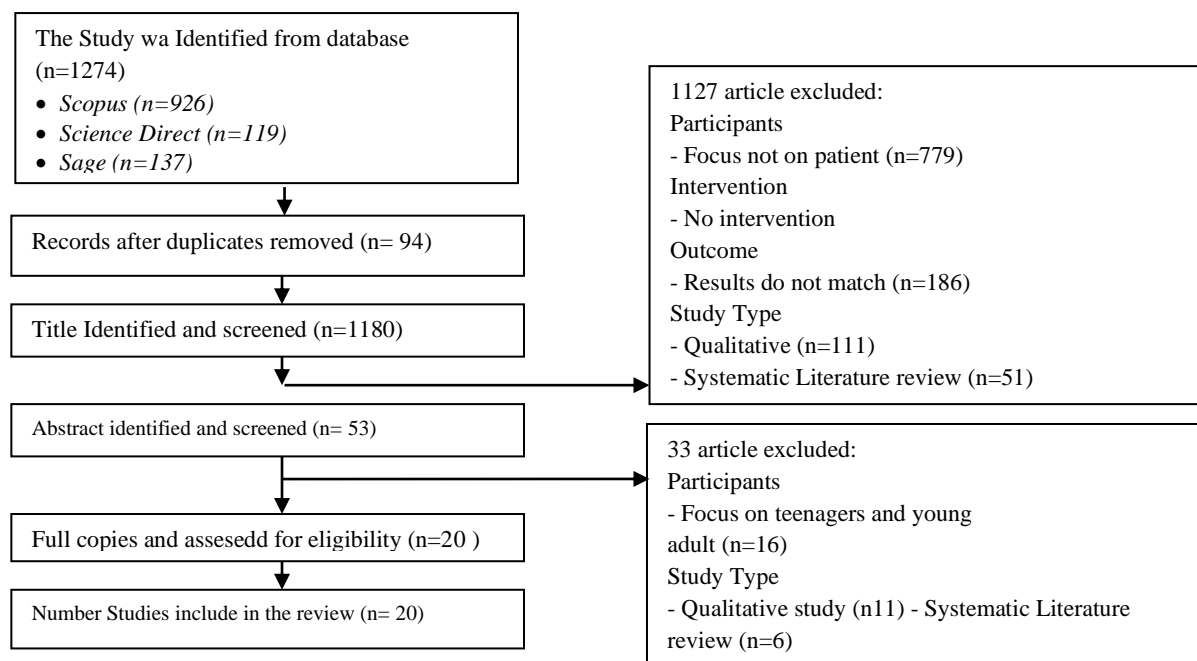

Fig. 1. PRISMA diagram adapted from Moher et al. (2009).

## RESULT

Table 2  
Summary of included studies

| S/N | Author (year)                                                                                                                                                  | Sampling Method, Instruments used, Data analysis                                                                                                                                                                                                                                                                                                                                                                                                                                    | Sample, | Results                                                                                                                                                                                                                                                                                                                                                                                                                                                                                                                                                                                                                                                                                                                                                            |
|-----|----------------------------------------------------------------------------------------------------------------------------------------------------------------|-------------------------------------------------------------------------------------------------------------------------------------------------------------------------------------------------------------------------------------------------------------------------------------------------------------------------------------------------------------------------------------------------------------------------------------------------------------------------------------|---------|--------------------------------------------------------------------------------------------------------------------------------------------------------------------------------------------------------------------------------------------------------------------------------------------------------------------------------------------------------------------------------------------------------------------------------------------------------------------------------------------------------------------------------------------------------------------------------------------------------------------------------------------------------------------------------------------------------------------------------------------------------------------|
| 1   | Nonadherence after hospital discharge in patients with schizophrenia or schizoaffective disorder: A six-month naturalistic follow-up study (Vega et al., 2021) | Design: observational, prospective study<br>Subjects: 110 people with schizophrenia or schizoaffective disorder. The data collection process was carried out during hospitalization and followed up for six months.<br>Variables: Sociodemographic, clinical, psychopathological and treatment-related variables, non-adherence,<br>Instrument: Medication Possession Ratio (MPR) was used to assess adherence to oral antipsychotics<br>Analysis: multivariate logistic regression |         | Non-adherence was detected in 58.2% of patients. Based on the results of multivariate logistic regression analysis, low socioeconomic level (OR = 3.68; 95% CI = 1.42–9.53), use or abuse of certain drugs (OR = 2.79; 95% CI = 1.07–7.28), non-adherence as reasons for recurrence and repeated hospital admission (OR = 5.46; 95% CI = 2.00–14.90), and symptom severity (OR = 2.00; 95% CI = 1.02–3.95)<br>The belief that medication is not needed is the strongest factor that causes people with schizophrenia to not adhere to treatment. In addition there are factors of lower socioeconomic status, living alone, long suffering from illness, drug abuse, non-compliance can be divided into: intentional disobedience (and unintentional disobedience) |
| 2   | Factors Associated with Medication                                                                                                                             | Design: retrospective cross-sectional                                                                                                                                                                                                                                                                                                                                                                                                                                               |         | Based on research results. It                                                                                                                                                                                                                                                                                                                                                                                                                                                                                                                                                                                                                                                                                                                                      |

| S/N | Author (year)                                                                                                                                                                            | Sampling Method, Sample, Instruments used, Data analysis                                                                                                                                                                                                                                                                                                                                                                                                            | Results                                                                                                                                                                                                                                                                                                                                       |
|-----|------------------------------------------------------------------------------------------------------------------------------------------------------------------------------------------|---------------------------------------------------------------------------------------------------------------------------------------------------------------------------------------------------------------------------------------------------------------------------------------------------------------------------------------------------------------------------------------------------------------------------------------------------------------------|-----------------------------------------------------------------------------------------------------------------------------------------------------------------------------------------------------------------------------------------------------------------------------------------------------------------------------------------------|
|     | Adherence Among Patients with Severe Mental Disorders in China: A Propensity Score Matching Study, (Dou et al., 2020)                                                                    | study<br>Subjects: 1292 respondents with mental disorders (psychosis)<br>Variable: Factors that affect compliance<br>Instrument: questionnaire medication<br>Analysis: multivariate logistic regression analysis                                                                                                                                                                                                                                                    | was found that 686 groups had significantly better medication adherence by comparison (92.6% vs. 61.2%). Older age and periods of consolidation were associated with poor adherence, and education level was a positive determinant of adherence.                                                                                             |
| 3   | Medication adherence and its correlates among patients affected by schizophrenia with an episodic course: A large-scale multi-center cross-sectional study in China, (Wang et al., 2020) | Design: Cohort study<br>Subject: 1198 people with schizophrenia<br>Variables: Medication compliance, attitude in taking medication, negative side effects of drugs<br>Instruments: Medication Adherence Rating Scale (MARS), Clinical Global Impression-Severity of Illness (CGI-SI) and Sheehan Disability Scale-Chinese version (SDS-C)<br>Analysis: multivariate logistic regression analysis                                                                    | Based on the results of the study, it was found that 28.5% met the criteria for good adherence to antipsychotic treatment, the factors affecting medication adherence were age, steady income, and disease severity and being in the acute phase of the disease had a significant effect on medication adherence.                             |
| 4   | Analysis of Medication Adherence and Its Influencing Factors in Patients with Schizophrenia in the Chinese Institutional Environment, (Yu et al., 2021a)                                 | Design: a cross-sectional study<br>Subject: 316 people with schizophrenia<br>Variable: Factors that influence medication adherence<br>Instruments: The Medication Adherence Rating Scale (MARS), Positive and Negative Syndrome Scale (PANSS), General Self-Efficacy Scale (GSES), Schizophrenia Quality of Life Scale (SQLS), and Scale of Social Skills for Psychiatric Inpatients (SSPI)<br>Analysis: Linear regression analysis, descriptive analysis and ANOVA | Based on the results of the study, it was found that self-efficacy, psychosocial factors, symptoms/side effects, and daily activities had a significant effect on medication adherence ( $F = 30.210$ , $p < 0.001$ ).                                                                                                                        |
| 5   | The effects of the frequency of participation to the community mental health center on insight, treatment adherence and functionality, (Sahin et al., 2020)                              | Design: Retrospective study<br>Subject: 408 people with schizophrenia<br>Variable: Insight, compliance and function<br>Instruments: Medication Adherence Rating Scale (MARS), Global Assessment of Functioning (GAF),<br>Analysis: The Mann/Whitney U Test, the Pearson Chi/Square, Fisher Exact and Fisher/Freeman-Holton, ANOVA                                                                                                                                   | Based on the results of the study, it was found that patients had participated in mental health services, there was a significant difference in medication adherence                                                                                                                                                                          |
| 6   | Medication adherence in first-episode psychosis patients in Singapore, (Tan et al., 2019)                                                                                                | Design: a cross-sectional study<br>Subjects: 445 patients with psychosis<br>Variable: Medication adherence<br>Instrument: PANSS, Global Assessment of Functioning Scale<br>Analysis: multinomial logistic regression models                                                                                                                                                                                                                                         | Based on the results of a study of 445 patients, 51% were men with a mean age of 26.3 years, 74.6% had schizophrenia spectrum and delusional disorder, 14% had affective psychosis and 11.3% had brief psychotic disorder or psychotic disorder. unspecified psychotic. At 1-year follow-up, 65.5% reported regular compliance, 18.7% partial |

| S/N | Author (year)                                                                                                                                                        | Sampling Method, Instruments used, Sample, Data analysis                                                                                                                                                                                                                                                                                                                                                     | Results                                                                                                                                                                                                                                                                                                                                                                                                                                                                                                                                                                                                                                                                                                                                                                      |
|-----|----------------------------------------------------------------------------------------------------------------------------------------------------------------------|--------------------------------------------------------------------------------------------------------------------------------------------------------------------------------------------------------------------------------------------------------------------------------------------------------------------------------------------------------------------------------------------------------------|------------------------------------------------------------------------------------------------------------------------------------------------------------------------------------------------------------------------------------------------------------------------------------------------------------------------------------------------------------------------------------------------------------------------------------------------------------------------------------------------------------------------------------------------------------------------------------------------------------------------------------------------------------------------------------------------------------------------------------------------------------------------------|
|     |                                                                                                                                                                      |                                                                                                                                                                                                                                                                                                                                                                                                              | compliance and 15.8% non-adherence. Disobedience is correlated with male sex, living alone and having poor decision-making abilities and insights. Compliance is partly attributed to ethnic Malays and has served national service                                                                                                                                                                                                                                                                                                                                                                                                                                                                                                                                          |
| 7   | Treatment Adherence in Youth with First-Episode Psychosis: Impact of Family Support and Telehealth Delivery, (Alston et al., 2019)                                   | Design: retrospective study<br>Subjects: .113 respondents with schizophrenia<br>Variable: Family support and health services (telehealth)<br>Instrument: chart review<br>Analysis: A Poisson regression model                                                                                                                                                                                                | Based on the results of the study, 47% who participated in intervention activities stated that the provision of mental health services directly (face to face) by health workers and social support was one of the factors that led to adherence in treatment.                                                                                                                                                                                                                                                                                                                                                                                                                                                                                                               |
| 8   | Correlates of poor medication adherence in chronic psychotic disorders, (Sajatovic et al., 2021)                                                                     | Design: a cross-sectional study<br>Subjects: Population of 100 people with chronic mental disorders (schizophrenia) who have poor adherence. Samples of people with chronic mental disorders are over 18 years old and are in a mental hospital or IRJ. Large Sampling Techniques<br>Sample<br>Instrument: PANSS, Global Assessment of Functioning Scale<br>Analysis: multinomial logistic regression models | Based on the results of the study the mean age was 35.7 years (up to 8.8), 61% were male and 80% had schizophrenia, with a mean age at onset of 22.4 (to 7.6) years.<br>The average proportion of missed CPD medications was 64%. One in ten have alcohol dependence. Most individuals have some barriers to compliance. Most of the clinical variables are not significant related to the Routine Tablet Questionnaire; However, hospitalized patients with CPD are more likely to have poorer adherence (P 0.01), as did individuals with worse treatment attitudes (Drug Attitude Inventory, P < 0.01), higher CPD symptoms severity (Short Psychiatric Rating Scale, P < 0.001) and higher risk of alcohol use (Identification of Alcohol Use Disorders Test, P < 0.001) |
| 9   | An analysis of the relationship between social support levels and treatment compliance of individuals diagnosed with schizophrenia Özlem, (Şahin Altun et al., 2021) | Design: descriptive and correlational<br>Subjects: Population: All schizophrenic patients who visited the IRJ from June 2017 to January 2018. Samples of patients with schizophrenia Total sampling technique was sampling with the criteria for being diagnosed with schizophrenia, schizophrenia in                                                                                                        | Based on the results of this study, it was found that there was a relationship between the level of social support and medication adherence of individuals with schizophrenia                                                                                                                                                                                                                                                                                                                                                                                                                                                                                                                                                                                                |



| S/N | Author (year)                                                                                                                                                                   | Sampling Method, Sample, Instruments used, Data analysis                                                                                                                                                                                                                                                                                                                                                                                                                                                                                                                                                                                                                                                                                                                                                                                                                                                                                                                                                                                                                                                                                                                                                                                                                                                                                                                                                                                                                                                                                                                                                                                                                                                                                                                                                                                              | Results                                                                                                                                                                                                                                                                                                                                                                                                        |
|-----|---------------------------------------------------------------------------------------------------------------------------------------------------------------------------------|-------------------------------------------------------------------------------------------------------------------------------------------------------------------------------------------------------------------------------------------------------------------------------------------------------------------------------------------------------------------------------------------------------------------------------------------------------------------------------------------------------------------------------------------------------------------------------------------------------------------------------------------------------------------------------------------------------------------------------------------------------------------------------------------------------------------------------------------------------------------------------------------------------------------------------------------------------------------------------------------------------------------------------------------------------------------------------------------------------------------------------------------------------------------------------------------------------------------------------------------------------------------------------------------------------------------------------------------------------------------------------------------------------------------------------------------------------------------------------------------------------------------------------------------------------------------------------------------------------------------------------------------------------------------------------------------------------------------------------------------------------------------------------------------------------------------------------------------------------|----------------------------------------------------------------------------------------------------------------------------------------------------------------------------------------------------------------------------------------------------------------------------------------------------------------------------------------------------------------------------------------------------------------|
| 10  | The influence of adherence to antipsychotics medication on the quality of life among patients with schizophrenia in Indonesia, (Endriyani et al., 2019)                         | <p>remission phase, not having physical and nervous system diseases, aged over 18 years. The exclusion criteria were being in an active period, having physical and nervous system diseases, not willing to be a respondent. Large sample of 110 patients with schizophrenia family</p> <p>Variable: social support with medication adherence</p> <p>Instruments: Personal information (age, gender, educational status, marital status, place of residence, income status, employment status, living (alone or with others), and leaving work due to interference, perceived social support (MSPSS) and Morisky compliance scale</p> <p>Analysis: Descriptive statistical data (number, mean, standard deviation, percentage distribution), Pearson's correlation analysis</p> <p>Design: descriptive cross-sectional design</p> <p>Subjects: Population of people with schizophrenia who visited the outpatient polyclinic between August and September 2014. The sample of people with schizophrenia with the criteria (1) a diagnosis of schizophrenia according to the Diagnostic and Statistical Guidelines for Mental Disorders (DSM IV)/(PPDGJ III), (2) aged between 18 and 65 years, (3) clinically stable (not acutely ill or have not been hospitalized for at least the last 3 months), (4) speak Indonesian, (5) Global Assessment of Function (GAF) Scale score &gt; 70, (6) received a type of oral antipsychotic medication, and (7) gave consent to participate in the study. That's a large sample of 139 respondents</p> <p>Sampling technique purposive sampling</p> <p>Variables: Independent Compliance and Dependent Variable Quality of Life</p> <p>Instruments: Glas-gow Antipsychotics Side-effect Scale (GASS), The drug attitude inventory (DAI-10) and SQOL-18</p> <p>Analysis: chi square and Fischer's exact test</p> | Based on the results of this study illustrates that drug side effects are the only factor that can affect medication adherence, socio-demographic factors show significant results in influencing quality of life, there is a significant relationship between medication adherence and quality of life, while the factors of residence and adherence treatment does not significantly predict quality of life |
| 11  | Mediating Effect Of The Motivation For Medication Use On Disease Management And Medication Adherence Among Community-Dwelling Patients With Schizophrenia, (Hsieh et al., 2019) | <p>Design: cross-sectional, descriptive correlation</p> <p>Subjects: Population of patients with schizophrenia A sample of patients with schizophrenia with criteria (1) diagnosed with schizophrenia based on DSM V; (2) aged 20-60 years; (3) get</p>                                                                                                                                                                                                                                                                                                                                                                                                                                                                                                                                                                                                                                                                                                                                                                                                                                                                                                                                                                                                                                                                                                                                                                                                                                                                                                                                                                                                                                                                                                                                                                                               | This study illustrates that almost half of patients with schizophrenia are not adherent to treatment. length of hospitalization, symptoms, side effects of treatment, general health                                                                                                                                                                                                                           |

| S/N | Author (year)                                                                                                                                        | Sampling Method, Sample, Instruments used, Data analysis                                                                                                                                                                                                                                                                                                                                                                                                                                                                                                                                                                                                                                                                                                                                                                                                                                                                                                                                                                                                                                                                                                                                                                                                                                                                        | Results                                                                                                                                                                                                                                                                                                                                                                                                                                                                            |
|-----|------------------------------------------------------------------------------------------------------------------------------------------------------|---------------------------------------------------------------------------------------------------------------------------------------------------------------------------------------------------------------------------------------------------------------------------------------------------------------------------------------------------------------------------------------------------------------------------------------------------------------------------------------------------------------------------------------------------------------------------------------------------------------------------------------------------------------------------------------------------------------------------------------------------------------------------------------------------------------------------------------------------------------------------------------------------------------------------------------------------------------------------------------------------------------------------------------------------------------------------------------------------------------------------------------------------------------------------------------------------------------------------------------------------------------------------------------------------------------------------------|------------------------------------------------------------------------------------------------------------------------------------------------------------------------------------------------------------------------------------------------------------------------------------------------------------------------------------------------------------------------------------------------------------------------------------------------------------------------------------|
|     |                                                                                                                                                      | <p>at least 1 type of antipsychotic drug; (4) willing to be a respondent Sampling technique convenience sampling of Large sample 373 patients with schizophrenia</p> <p>Variables: Independent factors that influence medication adherence, motivation, management-related factors</p> <p>Dependent medication adherence</p> <p>Instruments: the Global Assessment of Functioning (GAF), Brief Psychiatric Rating Scale (BPRS), and Glasgow Antipsychotic Side-effect Scale (GASS)</p> <p>Analysis: correlation and regression analysis</p>                                                                                                                                                                                                                                                                                                                                                                                                                                                                                                                                                                                                                                                                                                                                                                                     | <p>status, health facilities, knowledge, medical social support, and motivation to use drugs were associated with medication adherence to disease management (health facilities, knowledge, and medical social support) significantly affected drinking adherence. drug. If the disease management factor is difficult to change, then the motivation to use medication is important for medication adherence</p>                                                                  |
| 12  | The Relationship Between Treatment Adherence and Social Support in Psychiatric Patients in the East of Turkey, (Aylaz & Kılınç, 2017)                | <p>Design: descriptive study</p> <p>Subjects: The population is patients who received treatment during the period September 2014 and July 2015 totaling 799 people with mental disorders (354 receiving treatment in the community and 444 patients being hospitalized in the clinic), the sample size determined was 324 patients with mental disorders, the sampling technique used was random sampling method with inclusion criteria: Lives in the city center, over 18 years old, can communicate verbally. Exclusion Criteria: First time hospitalization, Have organic brain syndrome or mental retardation</p> <p>Variable: Adherence to treatment and social support</p> <p>Instruments: Demographics Questionnaire (age, gender, marital status, educational status, employment status, people living with, educational status and employment status of spouse, income status, place of residence, diagnosis of illness, family members suffering from mental disorders in the family and illness other factors that may cause mental disorders), Morisky Medication Adherence Scale (MMAS) and Multi-Dimensional Scale of Perceived Social Support (MSPSS)</p> <p>Analysis: analysis of variance, dependent and independent samples t-test and Pearson correlation test, Mann–Whitney U and Kruskal–Wallis tests</p> | <p>The results of this study provide an explanation and basis that: There is a significant difference between marital status and family support, There is a significant difference between patients who live alone and those who live with other people at home on social support, Patients who have higher income status have higher social support, adherence to treatment have higher scores at younger age, male gender, living with family, and higher educational status</p> |
| 13  | Does Spiritual Well-Being Affect Medication Adherence in Individuals Diagnosed with Mental Illness in Turkey?<br>Abdurrezzak Gültekin1 · Funda Kavak | <p>Design: correlational descriptive study</p> <p>Subjects: Population of 2500 adolescents who suffer from mental disorders and receive therapy Samples of people with mental disorders with</p>                                                                                                                                                                                                                                                                                                                                                                                                                                                                                                                                                                                                                                                                                                                                                                                                                                                                                                                                                                                                                                                                                                                                | <p>Based on the results of this study, it is illustrated that the relationship between spiritual well-being and adherence to medication in</p>                                                                                                                                                                                                                                                                                                                                     |



| S/N | Author (year)                                                                                                                                            | Sampling Method, Sample, Instruments used, Data analysis                                                                                                                                                                                                                                                                                                                                                                                                                                                                                                                                                                                                                                                                         | Results                                                                                                                                                                                                                                                                                                                                                                             |
|-----|----------------------------------------------------------------------------------------------------------------------------------------------------------|----------------------------------------------------------------------------------------------------------------------------------------------------------------------------------------------------------------------------------------------------------------------------------------------------------------------------------------------------------------------------------------------------------------------------------------------------------------------------------------------------------------------------------------------------------------------------------------------------------------------------------------------------------------------------------------------------------------------------------|-------------------------------------------------------------------------------------------------------------------------------------------------------------------------------------------------------------------------------------------------------------------------------------------------------------------------------------------------------------------------------------|
|     | Budak1<br>Accepted, (Gültekin & Kavak Budak, 2021)                                                                                                       | criteria (1) are 18 years old and over; (2) able to communicate and cooperate in various treatments carried out. The time for data collection starts from July 2017 and May 2018 Sample size 410 people with mental disorders Sampling technique is simple random sampling Variable: Medication Adherence Instruments: description of individual characteristics, the spiritual well-being scale, and the Morisky medication adherence scale Analysis: independent samples t-test, analysis of variance, linear regression and correlation                                                                                                                                                                                       | individuals diagnosed with mental disorders                                                                                                                                                                                                                                                                                                                                         |
| 14  | Medication Adherence Using Electronic Monitoring in Severe Psychiatric Illness: 4 and 24 Weeks after Discharge, (Lee et al., 2019)                       | Design: Prospective Design<br>Subjects: A population of 81 people with mental disorders registered in the sample hospital People with mental disorders who meet the inclusion criteria, namely (1) diagnosed with schizophrenia or bipolar disorder based on DSM IV (2) aged between 18 – 65 years Sample size 52 respondents Sampling technique<br>Variable: Dependent medication adherence Independent<br>Instruments: Clinical Global Impression-Severity (CGI-S) scores, Drug Attitude Inventory (DAI) assessment, the Multidimensional Scale of Perceived Social Support (MSPSS), the Korean Wechsler Intelligence Scale (K-WAIS-IV)<br>Analysis: The chi-square test, one-way ANOVA, and Kruskal-Wallis, The Mann Whitney, | The results of this study indicate that the factors that influence medication adherence are attitudes and physical satisfaction                                                                                                                                                                                                                                                     |
| 15  | Medication Adherence Using Electronic Monitoring in Severe Psychiatric Illness: 4 and 24 Weeks after Discharge, (Lee et al., 2019)                       | Design: a cross-sectional and correlational research design.<br>Subject: Sample size 92 respondents Sampling technique Convenience sampling<br>Variables: Insight, religion, side effects, type of antipsychotic, social support from others nurse-client relationship<br>Instrument: self-reported questionnaire<br>Analysis: Descriptive analyses, Pearson Correlation Test, Chi-square test for association, linear and logistic regression analyses, Post Hoc                                                                                                                                                                                                                                                                | Based on the results of this study, it was found that there were six factors (in-Knowledge, religion, side effects, types of antipsychotics, social support from the closest people, and nurse-client relationship) which were significant predictors of medication adherence, while the nurse-client relationship the client does not have a significant relationship with insight |
| 16  | Analysis of Medication Adherence and Its Influencing Factors in Patients with Schizophrenia in the Chinese Institutional Environment, (Yu et al., 2021b) | Design: A cross-sectional study<br>Subjects: The population of schizophrenic patients was 807 patients with schizophrenia samples recorded from November 2018 to January 2019 with the criteria (1) Diagnosed with schizophrenia according to the DSM-5                                                                                                                                                                                                                                                                                                                                                                                                                                                                          | The results of this study provide an explanation and basis that based on correlation analysis shows that there is no significant relationship between medication adherence and                                                                                                                                                                                                      |

| S/N | Author (year)                                                                                                                                                                                     | Sampling Method, Sample, Instruments used, Data analysis                                                                                                                                                                                                                                                                                                                                                                                                                                                                                                                                                                                                                                                                                                                                       | Results                                                                                                                                                                                                                                                                                                                                                                                                                                                                                                                       |
|-----|---------------------------------------------------------------------------------------------------------------------------------------------------------------------------------------------------|------------------------------------------------------------------------------------------------------------------------------------------------------------------------------------------------------------------------------------------------------------------------------------------------------------------------------------------------------------------------------------------------------------------------------------------------------------------------------------------------------------------------------------------------------------------------------------------------------------------------------------------------------------------------------------------------------------------------------------------------------------------------------------------------|-------------------------------------------------------------------------------------------------------------------------------------------------------------------------------------------------------------------------------------------------------------------------------------------------------------------------------------------------------------------------------------------------------------------------------------------------------------------------------------------------------------------------------|
|     |                                                                                                                                                                                                   | criteria (2) Age 18 years - 70 years (3) continuous hospitalization for one month, (4) education above junior high school, (5) no visual or hearing impairment, (6) ability to be able to complete the given instrument independently, (7) participants/legal guardians/relatives gave written consent Sample size 217 people with schizophrenia Engineering Sampling A systematic sampling method Variable: medication adherence and the factors that influence it Instruments: The Medication Adherence Rating Scale (MARS), Positive and Negative Syndrome Scale (PANSS), General Self-Efficacy Scale (GSES), Schizophrenia Quality of Life Scale (SQLS), and Scale of Social Skills for Psychiatric Inpatients (SSPI) Analysis: descriptive analysis and ANOVA, linear regression analysis | symptoms ( $p > 0.05$ ) but there is a positive relationship with self-efficacy, quality of life, and activities of daily living ( $p > 0.05$ ). $< 0.01$ ). Linear regression analysis showed that self-efficacy, psychosocial factors, symptoms/side effects, and daily activities had a significant effect on medication adherence ( $F = 30.210$ , $p < 0.001$ ).                                                                                                                                                         |
| 17  | Antipsychotic medication adherence and preventive diabetes screening in Medicaid enrollees with serious mental illness: an analysis of real-world administrative data, (Stockbridge et al., 2021) | Design: cross sectional<br>Subject: Population sample Size 5502 respondents Sampling technique random sampling<br>Variables: Non-adherence in treatment, Instruments: Adherence Rating Scale (MARS), Positive and Negative Syndrome Scale (PANSS)<br>Analysis: logistic regression models                                                                                                                                                                                                                                                                                                                                                                                                                                                                                                      | Based on the results of the study, it was found that increasing age was significantly associated with improve medication adherence, but the relationship between age and diabetes screening varies by sex. The characteristic that is significantly associated with the variation in quality according to one or both measures is Education in which this Education is also (associated with antipsychotic medication adherence), area associated with adherence and diabetes screening), obesity (associated with adherence. |
| 18  | Cognitive insight is correlated with cognitive impairments and contributes to medication adherence in schizophrenia patients, (Lui et al., 2021)                                                  | Design: Cross sectional<br>Subject: Population sample Size 5502 respondents Sampling technique convenient sampling<br>Variables: Non-adherence in treatment, Instruments: Brief Adherence Rating Scale (BARS), Global Clinical Impression (CGI) scale,<br>Analysis: logistic regression models                                                                                                                                                                                                                                                                                                                                                                                                                                                                                                 | Based on the results of the study, it was found that insight was related to cognitive insight that significantly affected medication adherence                                                                                                                                                                                                                                                                                                                                                                                |
| 19  | Medication Adherence in Adolescents with Psychiatric Disorders, (Both et al., 2021)                                                                                                               | Design: Multicenter SEMA study (Subjective<br>Subjects: Population of children and adolescents with mental disorders sample of children and adolescents with mental disorders Inclusion criteria                                                                                                                                                                                                                                                                                                                                                                                                                                                                                                                                                                                               | Based on the results of the study, it was found that of $n = 75$ adolescents who were involved in the study, $n = 45$ (60%) were declared to be fully compliant with                                                                                                                                                                                                                                                                                                                                                          |

| S/N | Author (year)                                                                                                                                                          | Sampling Method, Sample, Instruments used, Data analysis                                                                                                                                                                                                                                                                                                                                                                                  | Results                                                                                                                                                                                                                                                                                                                                                                                                                                                                                                                                                                                                                                                                                                                                                                                                                                                                                                                                                     |
|-----|------------------------------------------------------------------------------------------------------------------------------------------------------------------------|-------------------------------------------------------------------------------------------------------------------------------------------------------------------------------------------------------------------------------------------------------------------------------------------------------------------------------------------------------------------------------------------------------------------------------------------|-------------------------------------------------------------------------------------------------------------------------------------------------------------------------------------------------------------------------------------------------------------------------------------------------------------------------------------------------------------------------------------------------------------------------------------------------------------------------------------------------------------------------------------------------------------------------------------------------------------------------------------------------------------------------------------------------------------------------------------------------------------------------------------------------------------------------------------------------------------------------------------------------------------------------------------------------------------|
|     |                                                                                                                                                                        | were: (1) ages between 12;0 and <18;0 years, (2) prescription of psychotropic drugs for the treatment of mental disorders for at least 2 weeks at the time of inclusion, and (3) general medical conditions that allowed participation. Sampling Technique Variable: Treatment adherence Instruments: (Questionnaire on Attitudes Toward Treatment) and the MARS (Medication Adherence Rating Scale) Analysis: logistic regression models | treatment. Patients who received monotherapy were more often completely adherent than those who received different drug combinations.                                                                                                                                                                                                                                                                                                                                                                                                                                                                                                                                                                                                                                                                                                                                                                                                                       |
| 20  | Impact of adverse reactions to first-generation antipsychotics on treatment adherence in outpatients with schizophrenia: a cross-sectional study, (Bahta et al., 2021) | Desain: cross sectional<br>Subjek: Populasi sampel Besar sampel<br>Teknik Sampling<br>Variabel: adherence<br>Instrumen: (Medication Adherence Rating Scale)<br>Analisis: Chi-square tests                                                                                                                                                                                                                                                 | Based on the results of the study, it was found that more than a third (35.5%) of patients with schizophrenia did not adhere to treatment. The odds of non-adherence increased 1.06 times for each unit increase in total ADR score (AOR = 1.06, 95% CI 1.04, 1.09). Patients with extrapyramidal (AOR = 44.69, 95% CI 5.98, 334.30), psychological (AOR = 14.90, 95% CI 1.90, 116.86), hormonal (AOR = 2.60, 95% CI 1.41, 4.80), autonomic (AOR = 3.23, 95% CI 1.37, 7.57) and other reactions (AOR = 2.16, 95% CI 1.13, 4 ,13) were more likely to be disobedient compared to their peers. Conclusions: Poor treatment adherence was found to be substantially associated with the total ADR score, extrapyramidal, hormonal, psychological, autonomic and miscellaneous reaction categories of LUNSER. To improve medication adherence, early detection and management of side effects and inclusion of second-generation antipsychotics are recommended |

Adherence can be identified as the patient's behavior towards the recommendations that have been given and has also been agreed between the patient and health workers, one of which is adherence in taking medication. In this systematic review, treatment adherence factors are classified into 2, namely:

1. Internal factors that affect medication adherence in schizophrenic patients consist of (1) the patient's own belief that medication is not needed for healing (2) relatively older age (3) self-efficacy (4) general health status (5) gender men (6) poorer treatment attitude (7) poor decision-making ability (8) poor insight (10) side effects

2. External factors

External factors that affect medication adherence consist of (1) lower socioeconomic status (2) living alone (3) length of illness (4) drug abuse (5) education level (6) severity of illness for example being in the acute phase (7) participating in mental health services (8) health facilities (9) marital status (10) receiving monotherapy

3. Psychosocial factors

psychosocial factors that affect medication adherence consist of (1) social support, (2) living with family

## **DISCUSSION**

This review aimed to analyze empirical findings that identified factors associated with medication adherence among adults with schizophrenia. The findings revealed two factors that are associated with medication adherence. Factors include Greater awareness of illness (insight), previous history of medication adherence, positive attitude toward medication, types of atypical antipsychotics, less severe psychotic symptoms, and social support, self-efficacy, general health status, gender men, lower socioeconomic status, living alone, length of illness, drug abuse, education level, severity of illness for example being in the acute phase, participating in mental health services, health facilities, marital status, receiving monotherapy.

Awareness of illness among schizophrenic patients is widely associated with two theories. Lack of awareness may be caused by psychological defense mechanisms as a form of refusal to face the perceived illness, or the presence of cognitive disorders that prevent them from understanding their illness better (Amador et al., 1991).

Previous history of medication adherence related to adherence can be explained through the Transtheoretical Model (Prochaska, DiClemente, & Norcross, 1992). This model suggests that each individual goes through stages of behavior change starting from pre-contemplation,

contemplation, preparation, action and then the maintenance stage (Prochaska et al., 1992). Patients with adherence behavior are already in the maintenance phase which aims to prevent recurrence of the disease and enjoy the benefits of being obedient. Therefore, it is very likely that these patients will adhere to the next treatment period or the period of undergoing treatment.

Attitudes toward treatment stem from the perceived benefits of using drugs (Goodman, Knoll, Isakov, & Silver, 2005). In addition, negative attitudes are also associated with impaired working memory which may prevent patients from experiencing the real benefits of taking medication (Goodman et al., 2005). Therefore, those who have severe symptoms cannot make the right decision to take medication, which leads to non-adherence to taking medication. Social support consists of physiological and behavioral mechanisms, Through physiological mechanisms, social support activates the autonomic nervous system and the neuroendocrine system, which can help a person to reduce Through behavioral mechanisms, social support can influence health behavior. Therefore, social support must provide benefits for individuals such as positive health behaviors (adherence to taking medication) (Cohen, 1988).

Based on studies that have been conducted on patients with schizophrenia who are generally clinically stable, it was found that there is a correlation between insight in patients with medication adherence, the insight referred to in this case is clinical insight and insight into the knowledge possessed by the patient, (Lui et al., 2021). Knowledge can be a very effective motivator or reinforcer for someone, especially in this case, people with schizophrenia who do have a relatively longer time of onset of illness to learn to gradually change their behavior for the better, especially regarding adherence to the treatment program that is followed. The attitude factor is also one of the patient's internal factors that affect adherence. Based on several research results, it was found that a poor or uncooperative attitude towards treatment is one of the factors causing non-adherence to treatment undertaken by people with schizophrenia, (Sajatovic et al., 2021) . Other influencing factors are age, fixed income, and disease severity and being in the acute phase of the disease has a significant effect on age medication adherence. The elderly have the motivation to live healthy and always pay attention to their health, (Wang et al., 2020). The tendency to increase or increase in age is essential to improve medication adherence, (Stockbridge et al., 2021); (Aylaz & Kılınç, 2017).

The side effects that arise are often the reason for non-adherence to treatment undertaken by people with schizophrenia, extrapyramidal syndrome effects, hormonal effects, psychological effects on mood changes or other categories of reactions (Bahta et al., 2021). Side effects of treatment will also increase along with the multiple treatments that have been undertaken, patients who receive monotherapy or one type of drug are more often completely

adhered to than those who receive different drug combinations, (Both et al., 2021). This is because the perceived side effects have an impact on the activities or daily life of people with schizophrenia, (Yu et al., 2021b). In some patients who receive different types of antipsychotics, they will get different responses or results so that this will also be one of the determinants of treatment adherence, (Lee et al., 2019).

In a broader perspective, the attitude taken by the individual is the main and essential thing in determining the feeling or adherence to the treatment being undertaken, (Lee et al., 2019). Individual attitudes in complying with all therapeutic regimens undertaken by various factors including their spiritual beliefs, based on the results of this study it is illustrated that there is a significant relationship between spiritual well-being and medication adherence in individuals diagnosed with mental disorders, (Gültekin & Kavak Budak, 2021) .

Family, social or external environment related to medication adherence in people with schizophrenia. In some studies it is described that patients with schizophrenia do not adhere to medication. length of hospitalization, health facilities, knowledge, medical social support, and motivation to use drugs, all of these factors are external factors outside the patient so that in principle there is a need to optimize this resource, (Hsieh et al., 2019).

#### *Implications of This Review*

Findings from the results of this literature review can help design interventions based on: the factors that have been identified. Based on the information gathered, nurses can play a role in improving medication adherence among their schizophrenic patients in clinical practice. Awareness of the disease is closely related to medication adherence. Nurses can provide psychoeducation to clients and their families about their illness by increasing knowledge about illness and treatment (Sajatovic et al., 2021). Psychoeducation sessions should include elements such as symptom management. The presence of psychotic symptoms is also a factor associated with adherence shown in the literature. Because drug side effects are related to adherence and have been reviewed frequently, nurses should play an important role in monitoring drug use and reviewing drug side effects and discussing with patients strategies to improve them. side effects (Leijala et al., 2021).

#### **STUDY LIMITATION**

There are several research limitations that need to be considered in this systematic review. First, there are thirteen articles (19.7%) which have almost the same research results but different research locations so that from the thirteen articles the identification results obtained are approximately the same. In addition, most of the studies (90.1%) were studies with a cross-



sectional design so that it was not possible to determine a causal relationship. Apart from the limitations in this study, the articles discussed in the study were quite numerous (total articles = and varied so that the factors identified in this literature review can be considered as internal factors as well as external factors that affect medication adherence.

## **CONCLUSION**

Overall, this review analyzed empirical findings that identified factors which are associated with medication adherence. These factors are important to design interventions to improve adherence. Literature gaps were identified, and suggestions for future interventions and research were also presented.

## **DECLARATION OF INTEREST STATEMENT**

There is no conflict of interest in writing this literature review

## REFERENCE

- Abdisa, E., Fekadu, G., Girma, S., Shibiru, T., Tilahun, T., Mohamed, H., Wakgari, A., Takele, A., Abebe, M., & Tsegaye, R. (2020). Self-stigma and medication adherence among patients with mental illness treated at Jimma University Medical Center, Southwest Ethiopia. *International Journal of Mental Health Systems*, *14*(1), 1–13. <https://doi.org/10.1186/s13033-020-00391-6>
- Amador, X. F., Strauss, D. H., Yale, S. A., & Gorman, J. M. (1991). Awareness of illness in schizophrenia. *Schizophrenia Bulletin*, *17*(1), 113–132.
- American Psychiatric Association, A. (2013). *Diagnostic and statistical manual of mental disorders* (Vol. 3). American Psychiatric Association Washington, DC.
- Alston, M., Bennett, C. F., & Rochani, H. (2019). Treatment Adherence in Youth with First-Episode Psychosis: Impact of Family Support and Telehealth Delivery. *Issues in Mental Health Nursing*, *40*(11), 951–956. <https://doi.org/10.1080/01612840.2019.1630532>
- Aylaz, R., & Kılınc, G. (2017). The Relationship Between Treatment Adherence and Social Support in Psychiatric Patients in the East of Turkey. *Archives of Psychiatric Nursing*, *31*(2), 157–163. <https://doi.org/10.1016/j.apnu.2016.09.008>
- Bahta, M., Ogbaghebriel, A., Russom, M., Tesfamariam, E. H., & Berhe, T. (2021). Impact of adverse reactions to first-generation antipsychotics on treatment adherence in outpatients with schizophrenia: a cross-sectional study. *Annals of General Psychiatry*, *20*(1), 1–7. <https://doi.org/10.1186/s12991-021-00348-0>
- Both, C., Mechler, K., Niemeyer, L., Jennen-Steinmetz, C., Hohmann, S., Schumm, L., Dittmann, R. W., & Häge, A. (2021). Medication adherence in adolescents with psychiatric disorders: The relevance of demographic and socioeconomic factors plus parents' assessments of their offspring's attitudes towards treatment. *Zeitschrift Fur Kinder- Und Jugendpsychiatrie Und Psychotherapie*, *49*(4), 295–306. <https://doi.org/10.1024/1422-4917/a000813>
- Chai, X., Liu, Y., Mao, Z., & Li, S. (2021). Barriers to medication adherence for rural patients with mental disorders in eastern China: a qualitative study. *BMC Psychiatry*, *21*(1), 1–8. <https://doi.org/10.1186/s12888-021-03144-y>
- Cohen, S. (1988). Psychosocial models of the role of social support in the etiology of physical disease. *Health Psychology*, *7*(3), 269.
- Dou, L., Hu, L., Zhang, N., Cutler, H., Wang, Y., & Li, S. (2020). Factors associated with medication adherence among patients with severe mental disorders in China: A propensity score matching study. *Patient Preference and Adherence*, *14*, 1329–1339. <https://doi.org/10.2147/PPA.S255934>
- Endriyani, L., Chien, C. H., Huang, X. Y., & Chieh-Yu, L. (2019). The influence of adherence to antipsychotics medication on the quality of life among patients with schizophrenia in Indonesia. *Perspectives in Psychiatric Care*, *55*(2), 147–152. <https://doi.org/10.1111/ppc.12276>
- Gültekin, A., & Kavak Budak, F. (2021). Does Spiritual Well-Being Affect Medication Adherence in Individuals Diagnosed with Mental Illness in Turkey? *Journal of Religion and Health*, *0123456789*. <https://doi.org/10.1007/s10943-021-01322-6>

- Hsieh, W. L., Lee, S. K., Chien, W. T., Liu, W. I., Lai, C. Y., & Liu, C. Y. (2019). Mediating effect of the motivation for medication use on disease management and medication adherence among community-dwelling patients with schizophrenia. *Patient Preference and Adherence*, *13*, 1877–1887. <https://doi.org/10.2147/PPA.S218553>
- Ingersoll, K. S., & Cohen, J. (2008). The impact of medication regimen factors on adherence to chronic treatment: a review of literature. *Journal of Behavioral Medicine*, *31*(3), 213–224.
- Kemenkes RI. (2018). Hasil Riset Kesehatan Dasar Tahun 2018. *Kementrian Kesehatan RI*, *53*(9), 1689–1699.
- Kementerian PPN. (2020). Pedoman Teknis Penyusunan Rencana Aksi - Edisi II Tujuan Pembangunan Berkelanjutan/ Sustainable Development Goals (TPB/SDGs). *Kementerian PPN*.
- Lee, Y., Lee, M. S., Jeong, H. G., Youn, H. C., & Kim, S. hyun. (2019). Medication adherence using electronic monitoring in severe psychiatric illness: 4 and 24 weeks after discharge. *Clinical Psychopharmacology and Neuroscience*, *17*(2), 288–296. <https://doi.org/10.9758/cpn.2019.17.2.288>
- Leijala, J., Kampman, O., Suvisaari, J., & Eskelinen, S. (2021). Daily functioning and symptom factors contributing to attitudes toward antipsychotic treatment and treatment adherence in outpatients with schizophrenia spectrum disorders. *BMC Psychiatry*, *21*(1), 1–11. <https://doi.org/10.1186/s12888-021-03037-0>
- Lui, S. S. Y., Lam, J. P. Y., Lam, J. W. S., Chui, W. W. H., Mui, J. H. C., Siu, B. W. M., Cheng, K. M., Cheung, E. F. C., & Chan, R. C. K. (2021). Cognitive insight is correlated with cognitive impairments and contributes to medication adherence in schizophrenia patients. *Asian Journal of Psychiatry*, *60*(March), 102644. <https://doi.org/10.1016/j.ajp.2021.102644>
- Meltzer, H. Y. (2013). Update on typical and atypical antipsychotic drugs. *Annual Review of Medicine*, *64*, 393–406.
- Perkins, D. O. (1999). Adherence to antipsychotic medications. *Journal of Clinical Psychiatry*, *60*, 25–30
- Şahin Altun, Ö., Asi Karakas, S., Öztürk, Z., & Polat, H. (2021). An analysis of the relationship between social support levels and treatment compliance of individuals diagnosed with schizophrenia. *Perspectives in Psychiatric Care*, *March*, 1–6. <https://doi.org/10.1111/ppc.12813>
- Sahin, S., Elboga, G., & Altindag, A. (2020). The effects of the frequency of participation to the community mental health center on insight, treatment adherence and functionality. *Klinik Psikiyatri Dergisi*, *23*(1), 64–71. <https://doi.org/10.5505/kpd.2020.49369>
- Sajatovic, M., Mbwambo, J., Lema, I., Blixen, C., Aebi, M. E., Wilson, B., Njiro, G., Burant, C. J., Cassidy, K. A., Levin, J. B., & Kaaya, S. (2021). Correlates of poor medication adherence in chronic psychotic disorders. *BJPsych Open*, *7*(1), 1–7. <https://doi.org/10.1192/bjo.2020.141>
- Sajatovic, M., Mbwambo, J., Lema, I., Blixen, C., Aebi, M. E., Wilson, B., Njiro, G., Burant, C. J., Cassidy, K. A., Levin, J. B., & Kaaya, S. (2021). Correlates of poor medication adherence in chronic psychotic disorders. *BJPsych Open*, *7*(1), 1–7. <https://doi.org/10.1192/bjo.2020.141>

- Stockbridge, E. L., Webb, N. J., Dhakal, E., Garg, M., Loethen, A. D., Miller, T. L., & Nandy, K. (2021). Antipsychotic medication adherence and preventive diabetes screening in Medicaid enrollees with serious mental illness: an analysis of real-world administrative data. *BMC Health Services Research*, *21*(1), 1–16. <https://doi.org/10.1186/s12913-020-06045-0>
- Tan, C., Abdin, E., Liang, W., Poon, L. Y., Poon, N. Y., & Verma, S. (2019). Medication adherence in first-episode psychosis patients in Singapore. *Early Intervention in Psychiatry*, *13*(4), 780–788. <https://doi.org/10.1111/eip.12559>
- Townsend, M. C. (2011). *Nursing Diagnosis in Psychiatric Nursing* (Vol. 148).
- Townsend, M. C., & Morgan, K. I. (2018). Psychiatric mental health nursing: Concepts of care in evidence-based practice. *Psychiatric Mental Health Nursing: Concepts of Care in Evidence-Based Practice*.
- Vega, D., Acosta, F. J., & Saavedra, P. (2021). Nonadherence after hospital discharge in patients with schizophrenia or schizoaffective disorder: A six-month naturalistic follow-up study. *Comprehensive Psychiatry*, *108*, 152240. <https://doi.org/10.1016/j.comppsy.2021.152240>
- Wang, D., Ross, B., Xi, C., Pan, Y., Zhou, L., Yang, X., Wu, G., Ouyang, X., Si, T., Liu, Z., & Hu, X. (2020). Medication adherence and its correlates among patients affected by schizophrenia with an episodic course: A large-scale multi-center cross-sectional study in China. *Asian Journal of Psychiatry*, *53*(May), 102198. <https://doi.org/10.1016/j.ajp.2020.102198>
- Yu, W., Tong, J., Sun, X., Chen, F., Zhang, J., Pei, Y., Zhang, T., Zhang, J., & Zhu, B. (2021a). Analysis of medication adherence and its influencing factors in patients with schizophrenia in the chinese institutional environment. *International Journal of Environmental Research and Public Health*, *18*(9), 1–10. <https://doi.org/10.3390/ijerph18094746>
- Yu, W., Tong, J., Sun, X., Chen, F., Zhang, J., Pei, Y., Zhang, T., Zhang, J., & Zhu, B. (2021b). Analysis of medication adherence and its influencing factors in patients with schizophrenia in the chinese institutional environment. *International Journal of Environmental Research and Public Health*, *18*(9), 1–11. <https://doi.org/10.3390/ijerph18094746>
- Videbeck, S. L. (2020). Psychiatric/mental health nursing. In *Nursing Clinics of North America* (Vol. 21, Issue 3). <https://doi.org/10.3928/0279-3695-19870801-16>
- WHO. (2019). *Schizophrenia*. [Www.Who.Int. https://www.who.int/news-room/fact-sheets/detail/schizophrenia](https://www.who.int/news-room/fact-sheets/detail/schizophrenia)
